# Supplementary material for: Assessment of Quality of Life of Transgender and Gender-Diverse Children and Adolescents in Melbourne, Australia, 2017-2020
Source: PubMed Central journal article supplement (PMC9896293; doi:10.1001/jamanetworkopen.2022.54292), 2023-02-02
Supplement: jamanetwopen-e2254292-s001.pdf [file jamanetwopen-e2254292-s001.pdf]

## Supplementary Online Content

Engel L, Majmudar I, Mihalopoulos C, Tollit MA, Pang KC. Assessment of quality of life of transgender and gender-diverse children and adolescents in Melbourne, Australia, 2017-2020. *JAMA Netw Open*. 2023;6(2):e2254292. doi:10.1001/jamanetworkopen.2022.54292

**eTable 1.** Summary of the Instruments Used in the Trans20 Study

**eFigure 1.** CHU-9D Scores by Age Group

**eFigure 2.** CHU-9D Scores by Gender Presumed at Birth

**eFigure 3.** Centile Chart Displaying CHU-9D Scores by Age and Gender Presumed at Birth

This supplementary material has been provided by the authors to give readers additional information about their work.

**eTable 1: Summary of the Instruments Used in the Trans20 Study**

| <b>Construct</b>                    | <b>Instrument</b>                                                                                                            | <b>Age range and source</b>                              |
|-------------------------------------|------------------------------------------------------------------------------------------------------------------------------|----------------------------------------------------------|
| <b>Quality of Life</b>              | Child Health Utility (CHU-9D)                                                                                                | Young person report: 6yrs+                               |
| <b>Demographics</b>                 | Trans20 questionnaire (age, sex assigned at birth, education level, country of origin and language spoken at home, postcode) | Parent report: all ages<br>Young person report: all ages |
| <b>Gender Identity</b>              | Trans20 questionnaire                                                                                                        | Young person report: all ages                            |
| <b>Health information</b>           |                                                                                                                              |                                                          |
| Gender Dysphoria                    | Gender Preoccupation and Stability Questionnaire (GPSQ)                                                                      | Young person report: 11yrs+                              |
| Physical and mental health problems | Trans20 questionnaire                                                                                                        | Parent report: all ages                                  |
| Mental health problems              | Child Behaviour Checklist (CBCL)                                                                                             | Parent report: all ages                                  |
| Suicidality                         | Columbia Suicide Severity Rating (CSSR)                                                                                      | Young person report: 12yrs+                              |
| <b>Social factors</b>               |                                                                                                                              |                                                          |
| Bullying                            | Gatehouse bullying scale                                                                                                     | Young person report: 8yrs+                               |
| Social Transition                   | Trans20 questionnaire                                                                                                        | Young person report: 8yrs+                               |
| Support                             | Trans20 questionnaire                                                                                                        | Young person report: all ages                            |

**eFigure 1: CHU-9D Scores by Age Group**

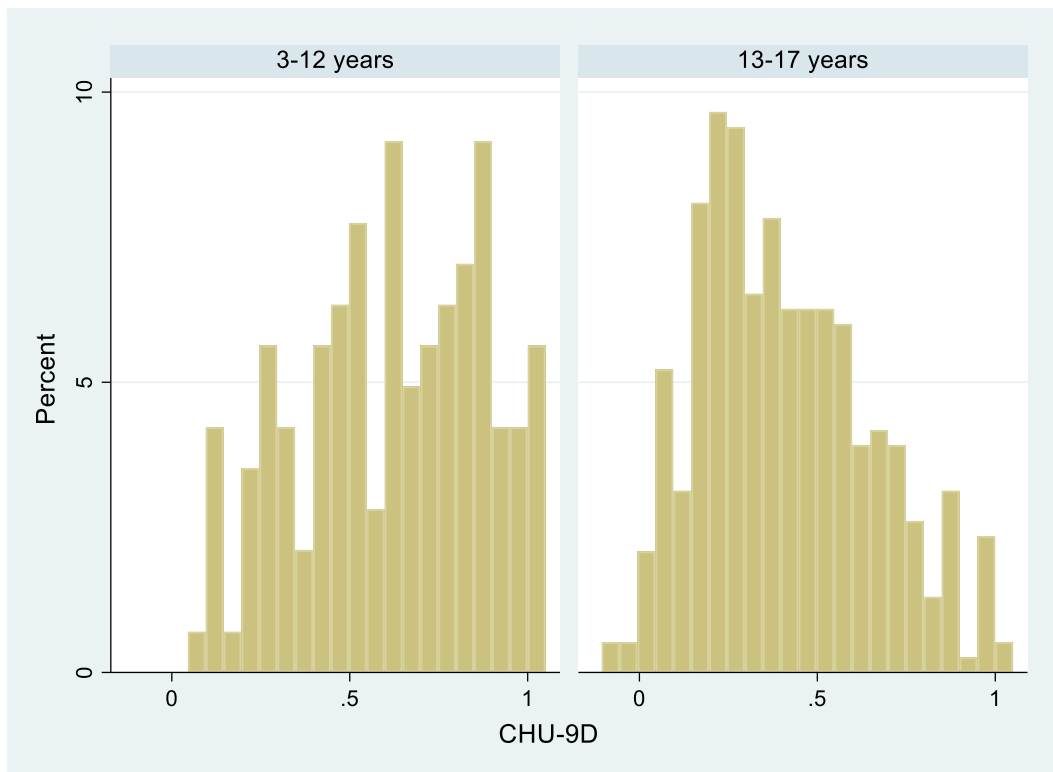

**eFigure 2: CHU-9D Scores by Gender Presumed at Birth**

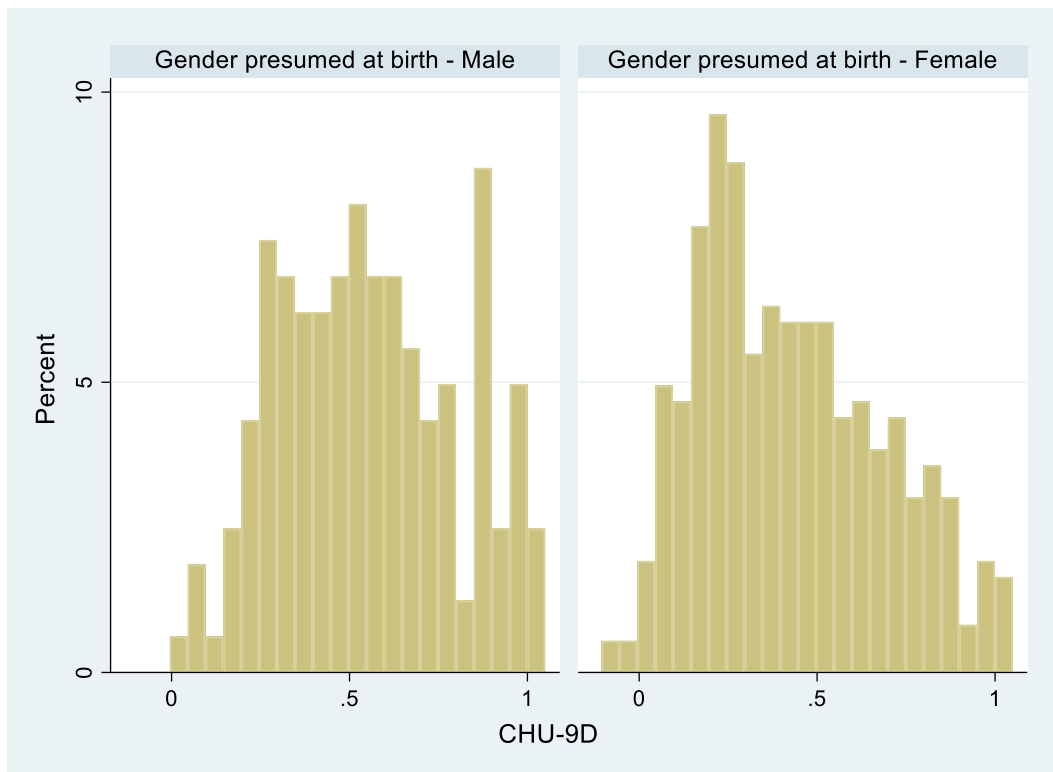

**eFigure 3: Centile Chart Displaying CHU-9D Scores by Age and Gender Presumed at Birth**

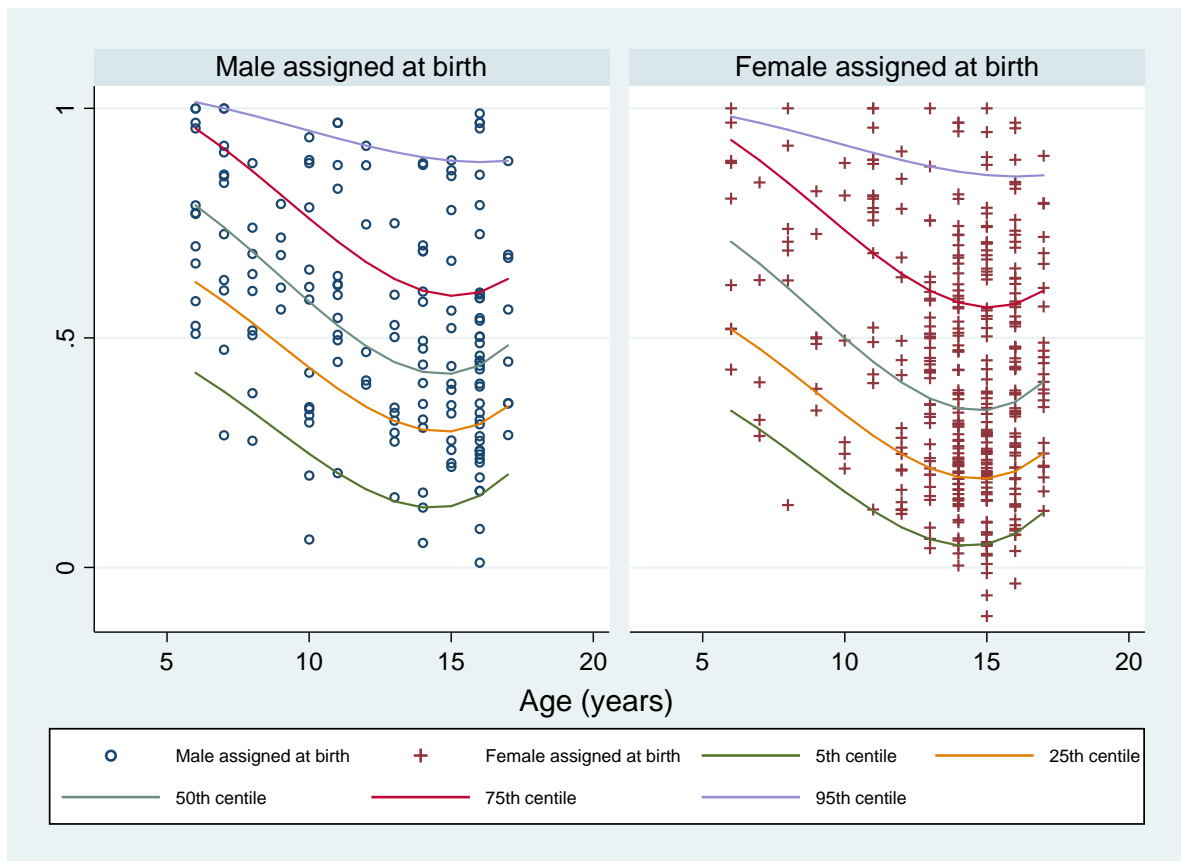

CHU-9D scores are plotted by age and gender presumed at birth. Centiles were predicted using quantile regression for the best fitting model for the mean, where the covariates are the power variable of age and gender presumed at birth.
