# Supplementary material for: Assessment of Quality of Life of Transgender and Gender-Diverse Children and Adolescents in Melbourne, Australia, 2017-2020
Source: PubMed Central journal article supplement (PMC9896293; doi:10.1001/jamanetworkopen.2022.54292), 2023-02-02
Supplement: jamanetwopen-e2254292-s002.pdf [file jamanetwopen-e2254292-s002.pdf]

## Data Sharing Statement

Engel. Assessment of Quality of Life of Transgender and Gender-Diverse Children and Adolescents in Melbourne, Australia, 2017-2020. *JAMA Netw Open*. Published February 02, 2023. doi:10.1001/jamanetworkopen.2022.54292

### Data

**Data available:** No
